# Supplementary material for: Identification of SSBP1 as a ferroptosis-related biomarker of glioblastoma based on a novel mitochondria-related gene risk model and in vitro experiments
Source: PubMed Central journal article supplement (PMC9524046; doi:10.1186/s12967-022-03657-4), 2022-09-30

**A**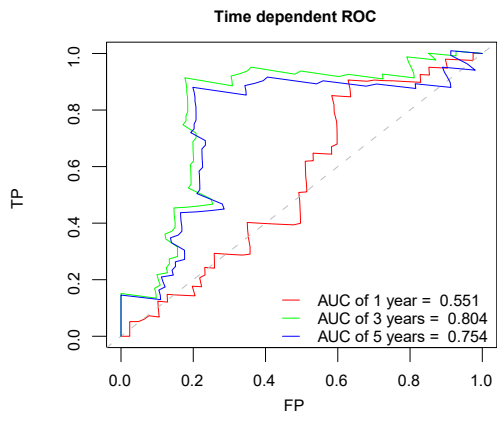**B**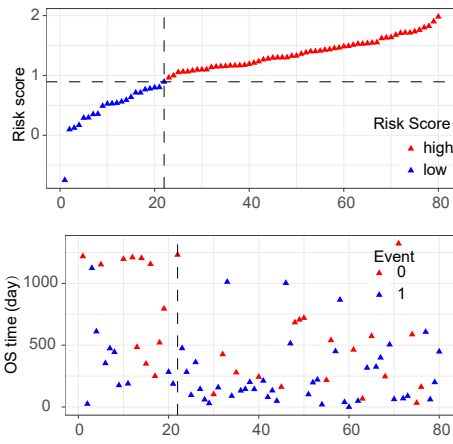**C**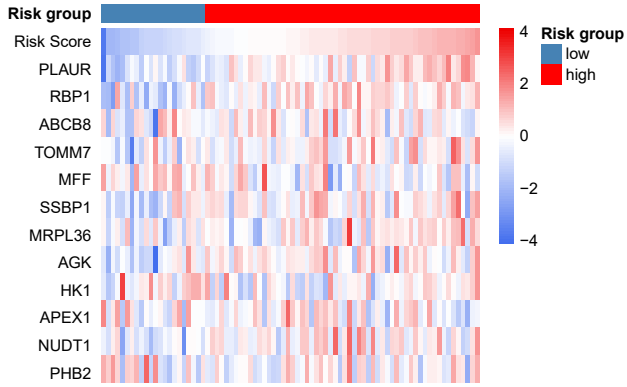**D**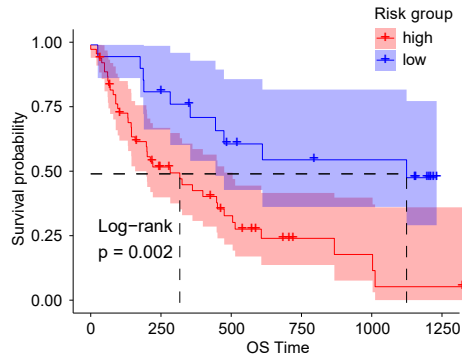**E**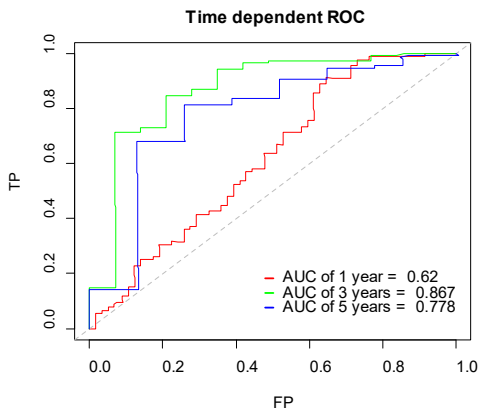**F**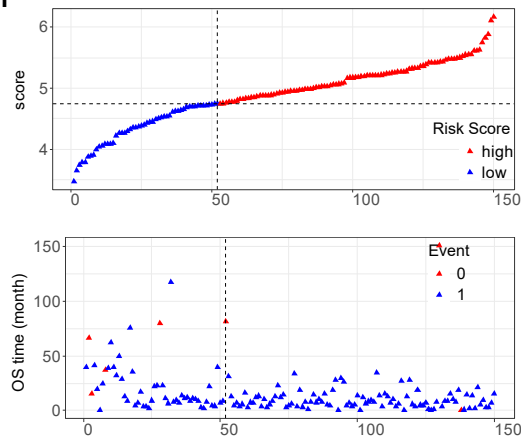**G**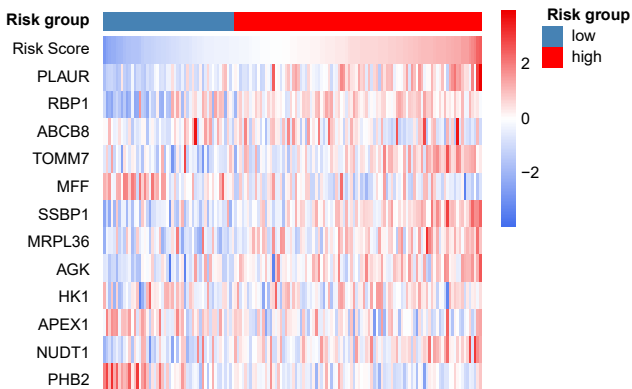**H**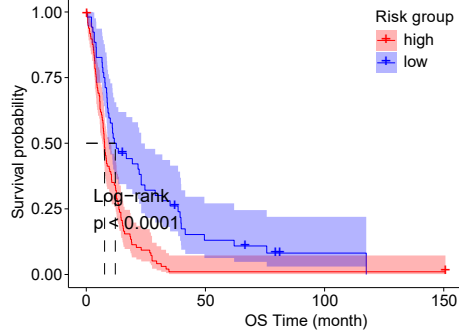

Supplement: 12967_2022_3657_MOESM1_ESM.pdf [file 12967_2022_3657_MOESM1_ESM.pdf]
