# Supplementary material for: Identification of SSBP1 as a ferroptosis-related biomarker of glioblastoma based on a novel mitochondria-related gene risk model and in vitro experiments
Source: PubMed Central journal article supplement (PMC9524046; doi:10.1186/s12967-022-03657-4), 2022-09-30

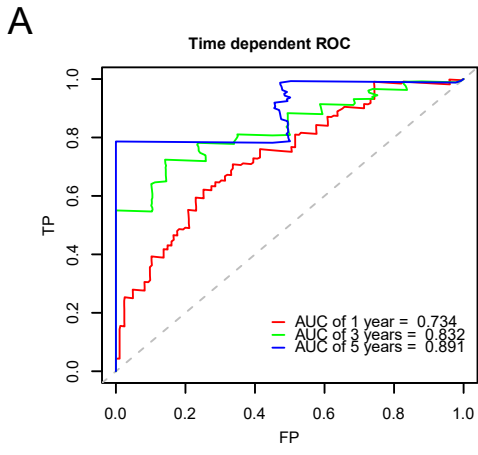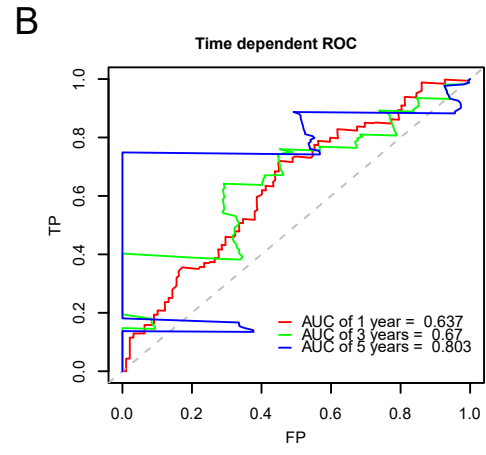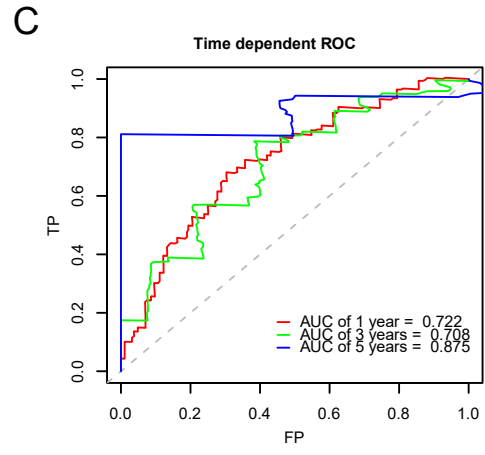

Supplement: 12967_2022_3657_MOESM3_ESM.pdf [file 12967_2022_3657_MOESM3_ESM.pdf]
