# Supplementary material for: Identification of SSBP1 as a ferroptosis-related biomarker of glioblastoma based on a novel mitochondria-related gene risk model and in vitro experiments
Source: Springer Nature journal article supplement (doi:10.1186/s12967-022-03657-4), 2022-09-30

**A**

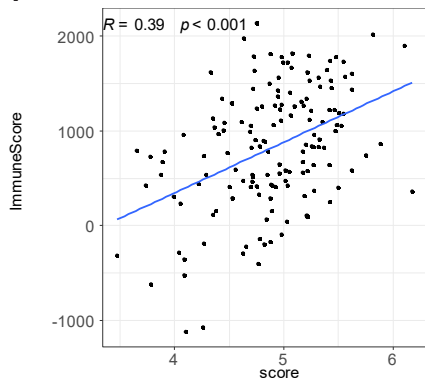

**B**

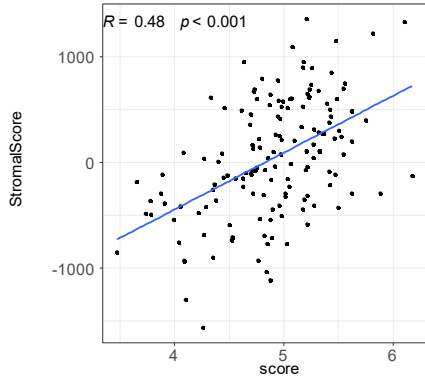

**C**

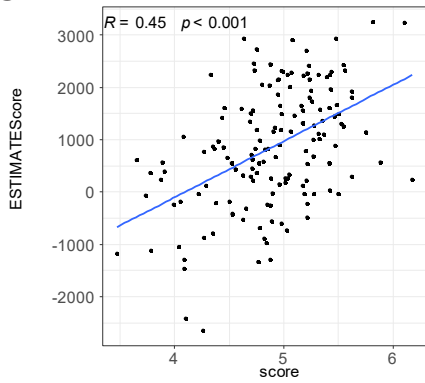

**F**

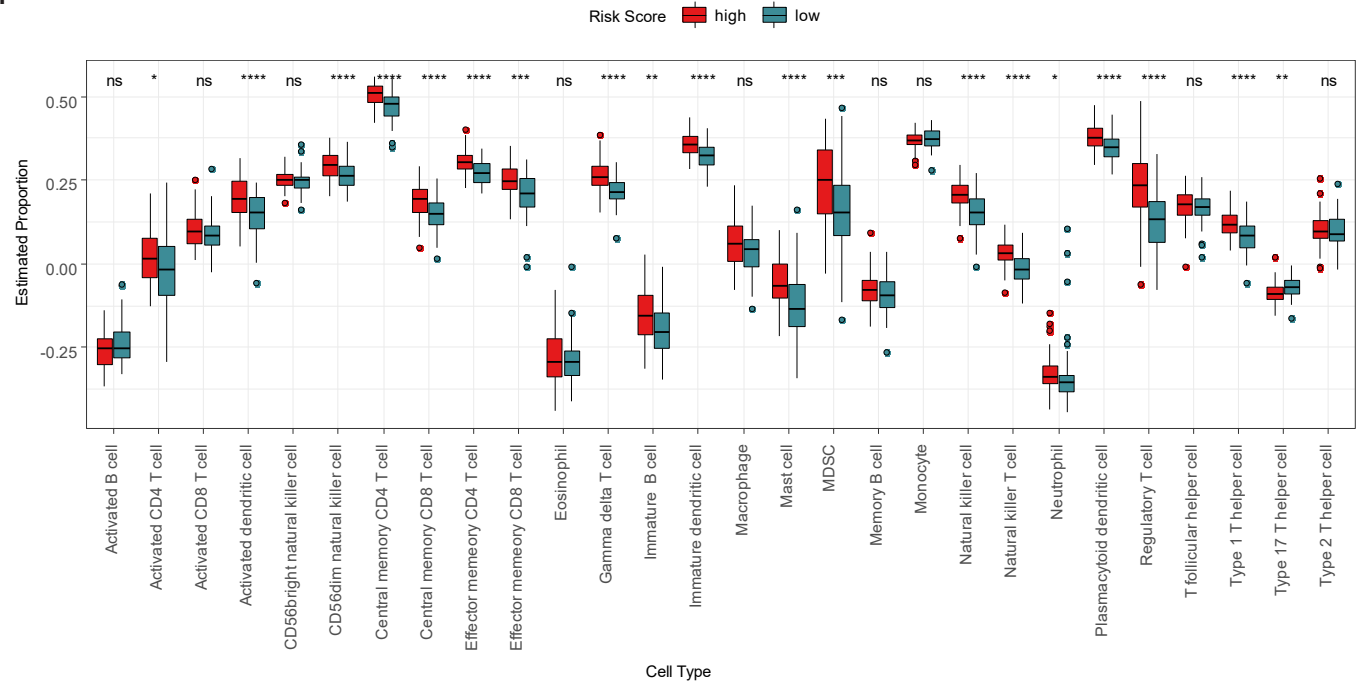

**D**

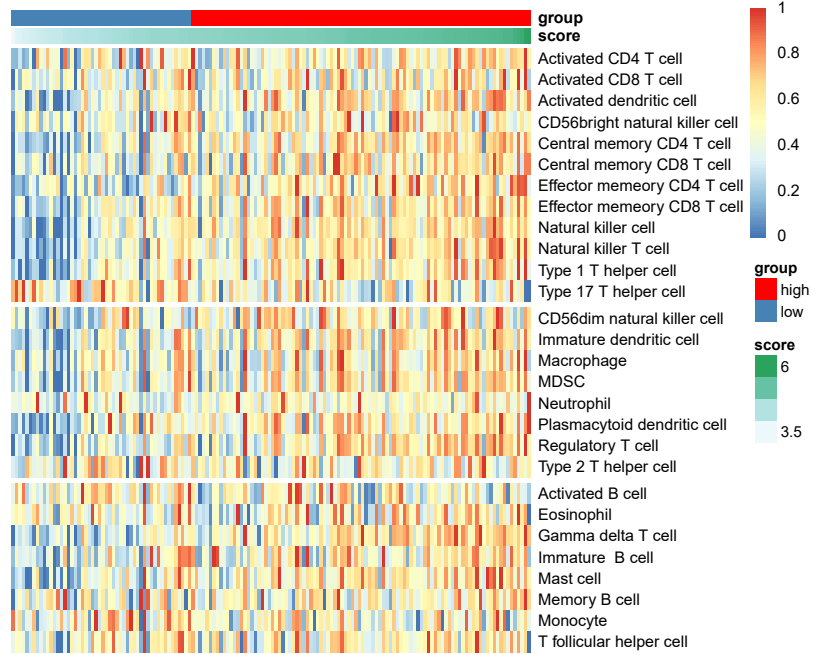

**E**

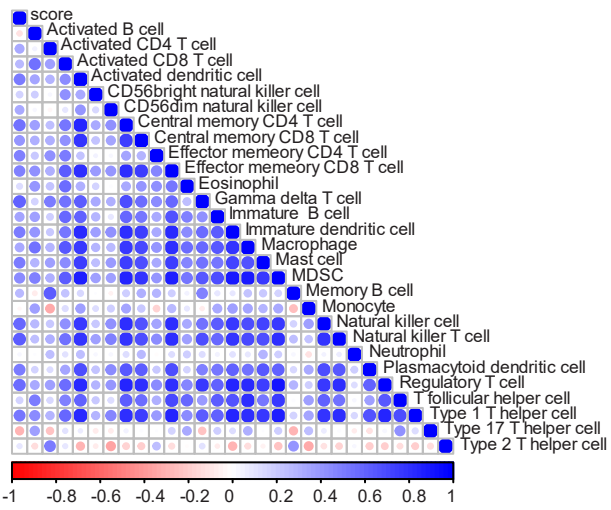

Supplement: MOESM5 [file 23558704]
