# Supplementary material for: Identification of SSBP1 as a ferroptosis-related biomarker of glioblastoma based on a novel mitochondria-related gene risk model and in vitro experiments
Source: J Transl Med. 2022 Sep 30;20:440. doi: 10.1186/s12967-022-03657-4 (PMC9524046; doi:10.1186/s12967-022-03657-4)
Supplement: Supplementary file 8 — Additional file 8: Table S3. The 201 DE-MRGs between neoplatstic and non-neoplastic cells. [file 12967_2022_3657_MOESM8_ESM.csv]

Supplementary Table 3: The 201 DE-MRGs between neoplatstic and non-neoplastic cells
	p_val	avg_log2FC	pct.1(neoplastic_cell)	pct.2(non-neoplastic_cell)	p_val_adj	gene
CLU	0	2.863662033	0.968	0.32	0	CLU
RNASET2	8.58E-265	-3.106929802	0.115	0.748	1.79E-260	RNASET2
HCLS1	8.69E-234	-2.181006601	0.015	0.634	1.81E-229	HCLS1
NGFRAP1	3.89E-218	1.307304874	0.867	0.314	8.10E-214	NGFRAP1
FEZ1	6.03E-171	1.076178711	0.691	0.191	1.25E-166	FEZ1
SGK1	3.61E-156	-2.167393248	0.487	0.838	7.51E-152	SGK1
CNR1	6.56E-156	1.049596116	0.333	0.023	1.36E-151	CNR1
TOMM7	9.06E-154	0.94592723	0.885	0.539	1.88E-149	TOMM7
PLA2G5	4.61E-145	0.86923833	0.297	0.016	9.59E-141	PLA2G5
ARC	1.93E-143	1.442295718	0.474	0.095	4.02E-139	ARC
PLAUR	1.27E-142	-2.36897209	0.144	0.586	2.65E-138	PLAUR
GPX1	2.96E-140	-2.138114338	0.683	0.861	6.17E-136	GPX1
CHPF	1.90E-136	1.129032582	0.444	0.091	3.96E-132	CHPF
ARRB2	4.42E-136	-0.476140247	0.123	0.562	9.19E-132	ARRB2
UQCRQ	5.06E-122	0.874469945	0.935	0.669	1.05E-117	UQCRQ
SSBP1	3.07E-121	0.922096295	0.769	0.391	6.38E-117	SSBP1
DLC1	2.43E-114	0.990634788	0.459	0.12	5.06E-110	DLC1
PYCARD	2.93E-112	-0.737785869	0.011	0.379	6.09E-108	PYCARD
VIM	7.00E-112	1.024972227	0.89	0.539	1.46E-107	VIM
SOD1	2.23E-111	1.153739312	0.841	0.512	4.64E-107	SOD1
DYNLL1	4.92E-111	1.031269931	0.852	0.559	1.02E-106	DYNLL1
RNF144B	5.32E-111	-1.256637366	0.046	0.424	1.11E-106	RNF144B
YWHAQ	2.46E-100	1.081741592	0.787	0.484	5.11E-96	YWHAQ
ROMO1	1.05E-99	0.591824823	0.849	0.57	2.19E-95	ROMO1
GGCT	3.52E-98	0.680893638	0.438	0.127	7.32E-94	GGCT
MRPL51	5.63E-96	0.756160752	0.69	0.334	1.17E-91	MRPL51
MLLT11	6.76E-93	1.234763931	0.48	0.163	1.41E-88	MLLT11
AHCYL1	5.16E-92	1.752137476	0.675	0.381	1.07E-87	AHCYL1
JUN	1.29E-90	1.092369078	0.71	0.379	2.68E-86	JUN
BAD	2.47E-87	0.633838553	0.513	0.2	5.14E-83	BAD
GNG12	4.01E-86	0.731722954	0.375	0.099	8.34E-82	GNG12
FZD3	6.96E-85	0.690288034	0.358	0.089	1.45E-80	FZD3
RBP1	1.88E-84	0.743675377	0.403	0.117	3.91E-80	RBP1
NLRP3	2.95E-84	-1.398328039	0.018	0.314	6.14E-80	NLRP3
ATP5J	5.84E-83	0.710539437	0.835	0.531	1.22E-78	ATP5J
MRPL36	1.63E-82	0.446449785	0.452	0.152	3.39E-78	MRPL36
APC2	2.03E-80	0.516281414	0.43	0.142	4.23E-76	APC2
ANK2	4.01E-79	0.576440713	0.47	0.165	8.34E-75	ANK2
TMX2	4.24E-79	0.93054672	0.543	0.242	8.82E-75	TMX2
REXO2	1.09E-78	0.564930058	0.426	0.143	2.26E-74	REXO2
YWHAE	1.50E-78	0.760448112	0.885	0.754	3.11E-74	YWHAE
GK	2.09E-77	-1.144134681	0.122	0.43	4.36E-73	GK
PDCD5	4.11E-77	0.450564842	0.595	0.277	8.55E-73	PDCD5
SPCS1	5.48E-75	0.776218956	0.7	0.416	1.14E-70	SPCS1
AGPAT5	9.60E-75	0.609205726	0.437	0.159	2.00E-70	AGPAT5
SFXN5	4.07E-74	0.343940567	0.355	0.098	8.47E-70	SFXN5
ATP5A1	4.20E-72	1.243862071	0.794	0.563	8.74E-68	ATP5A1
S100A9	2.47E-71	-1.06711649	0.012	0.267	5.13E-67	S100A9
HSD17B10	3.71E-71	0.759840132	0.543	0.256	7.73E-67	HSD17B10
GADD45GIP1	2.43E-70	0.608277422	0.637	0.347	5.05E-66	GADD45GIP1
ARL2BP	5.94E-69	0.85222757	0.528	0.241	1.23E-64	ARL2BP
TIMM13	1.03E-67	0.542359798	0.578	0.3	2.14E-63	TIMM13
SHC1	8.66E-67	1.091609803	0.518	0.26	1.80E-62	SHC1
FASTK	9.81E-67	0.692700325	0.442	0.181	2.04E-62	FASTK
HINT2	2.46E-65	0.450382548	0.439	0.172	5.13E-61	HINT2
FIS1	3.86E-64	0.574403557	0.653	0.383	8.03E-60	FIS1
MRPL32	4.01E-64	0.404084973	0.424	0.159	8.33E-60	MRPL32
C1QBP	4.05E-64	0.753555931	0.617	0.332	8.42E-60	C1QBP
TBRG4	2.36E-63	0.740772636	0.384	0.141	4.91E-59	TBRG4
WBSCR16	5.48E-62	0.338187187	0.263	0.065	1.14E-57	WBSCR16
MRPL13	4.77E-61	0.536765863	0.427	0.176	9.93E-57	MRPL13
PHB	6.17E-61	0.763669842	0.549	0.278	1.28E-56	PHB
ATP5F1	4.15E-60	0.788108968	0.715	0.471	8.64E-56	ATP5F1
MRPL20	3.40E-59	0.620298577	0.652	0.39	7.07E-55	MRPL20
GSTP1	3.64E-59	0.7123283	0.83	0.625	7.58E-55	GSTP1
NME4	7.39E-59	0.630266514	0.558	0.296	1.54E-54	NME4
STOML2	1.82E-58	0.681068136	0.463	0.211	3.78E-54	STOML2
MAPT	9.74E-58	0.518678926	0.396	0.145	2.03E-53	MAPT
HIGD1A	1.38E-56	0.64006568	0.623	0.36	2.88E-52	HIGD1A
RTN3	9.75E-56	0.719253807	0.797	0.578	2.03E-51	RTN3
MRPL19	3.82E-55	0.392062451	0.421	0.179	7.94E-51	MRPL19
SFXN1	4.49E-55	0.499809244	0.372	0.142	9.34E-51	SFXN1
GABARAPL2	5.90E-55	0.697549559	0.764	0.516	1.23E-50	GABARAPL2
UNG	7.25E-55	0.609718333	0.276	0.081	1.51E-50	UNG
AK2	1.34E-54	0.565619299	0.607	0.344	2.78E-50	AK2
MRPL42	2.61E-54	0.524411201	0.389	0.156	5.44E-50	MRPL42
NDUFS4	4.00E-54	0.425531018	0.497	0.236	8.33E-50	NDUFS4
ACSL4	7.33E-54	-0.57581948	0.139	0.399	1.52E-49	ACSL4
ATP5G1	1.27E-53	0.52049181	0.649	0.369	2.63E-49	ATP5G1
MRPL50	1.55E-53	0.432237986	0.328	0.111	3.23E-49	MRPL50
MRPL24	1.78E-53	0.419519956	0.379	0.148	3.71E-49	MRPL24
MFF	4.27E-53	0.661839683	0.585	0.328	8.89E-49	MFF
MRP63	1.15E-52	0.607721356	0.62	0.371	2.39E-48	MRP63
DUT	2.05E-51	0.548682791	0.518	0.268	4.27E-47	DUT
CYCS	1.11E-50	0.617371581	0.743	0.524	2.30E-46	CYCS
GARS	4.03E-49	0.670551716	0.485	0.247	8.39E-45	GARS
DNAJA3	1.13E-48	0.463795782	0.286	0.095	2.34E-44	DNAJA3
KIF1B	1.69E-48	0.537572874	0.752	0.5	3.52E-44	KIF1B
MPV17	7.48E-48	0.564806851	0.554	0.304	1.56E-43	MPV17
CRLS1	9.67E-48	0.448536775	0.403	0.18	2.01E-43	CRLS1
IFI6	5.35E-46	0.768498661	0.528	0.295	1.11E-41	IFI6
MRPL9	7.56E-46	0.469738198	0.369	0.158	1.57E-41	MRPL9
SLC25A4	9.88E-46	0.534544205	0.433	0.195	2.05E-41	SLC25A4
DIABLO	3.23E-45	0.569911967	0.427	0.203	6.72E-41	DIABLO
MCL1	3.79E-45	-0.844013788	0.592	0.782	7.88E-41	MCL1
NDUFB11	9.05E-45	0.433587651	0.71	0.454	1.88E-40	NDUFB11
PCNA	3.42E-44	0.546375005	0.331	0.134	7.12E-40	PCNA
MRPL37	5.27E-44	0.525685251	0.428	0.203	1.10E-39	MRPL37
AGK	8.68E-44	0.401239555	0.31	0.117	1.81E-39	AGK
MRPL39	8.80E-44	0.359579379	0.303	0.114	1.83E-39	MRPL39
TUFM	1.55E-43	0.796174019	0.639	0.436	3.22E-39	TUFM
BNIP3	1.47E-42	0.683058376	0.48	0.252	3.07E-38	BNIP3
PRELID1	1.89E-42	0.437893876	0.558	0.312	3.94E-38	PRELID1
SCP2	2.71E-42	0.580146443	0.59	0.364	5.63E-38	SCP2
NENF	7.41E-42	0.492196161	0.639	0.397	1.54E-37	NENF
FIBP	1.44E-41	0.571205185	0.478	0.251	2.99E-37	FIBP
DNAJA1	1.77E-41	0.624606384	0.695	0.492	3.68E-37	DNAJA1
CISD1	3.15E-41	0.299054827	0.349	0.15	6.55E-37	CISD1
PEMT	3.22E-41	0.341117745	0.317	0.128	6.70E-37	PEMT
ATPIF1	4.33E-40	0.465236639	0.695	0.463	9.01E-36	ATPIF1
YWHAH	5.13E-40	-1.00812721	0.425	0.634	1.07E-35	YWHAH
MRPL22	7.82E-40	0.306479103	0.347	0.152	1.63E-35	MRPL22
QTRT1	4.22E-38	0.355204179	0.303	0.123	8.78E-34	QTRT1
RG9MTD1	4.59E-38	0.374572632	0.358	0.164	9.55E-34	RG9MTD1
MRPL18	3.49E-37	0.328536481	0.417	0.209	7.26E-33	MRPL18
DAP3	6.73E-37	0.454941905	0.462	0.26	1.40E-32	DAP3
MRPL21	1.01E-36	0.292890739	0.437	0.225	2.10E-32	MRPL21
PINK1	1.91E-36	0.418220306	0.401	0.2	3.98E-32	PINK1
SIGMAR1	2.35E-36	0.53031469	0.385	0.191	4.89E-32	SIGMAR1
LRRK2	4.24E-36	-0.686347546	0.084	0.266	8.81E-32	LRRK2
FAM162A	5.05E-36	0.478597402	0.481	0.273	1.05E-31	FAM162A
MRPL3	1.07E-35	0.480083171	0.386	0.199	2.23E-31	MRPL3
ATPAF1	1.21E-35	0.472011961	0.351	0.164	2.51E-31	ATPAF1
MAP1LC3B	4.32E-35	0.648450856	0.696	0.526	8.98E-31	MAP1LC3B
BRP44L	1.26E-34	0.33826763	0.542	0.326	2.62E-30	BRP44L
MRPS18A	1.36E-34	0.373748344	0.328	0.15	2.82E-30	MRPS18A
TIMM17A	2.54E-34	0.481028718	0.459	0.262	5.28E-30	TIMM17A
MRPL11	4.48E-34	0.261242211	0.347	0.157	9.32E-30	MRPL11
NUDT1	6.62E-34	0.410833732	0.336	0.159	1.38E-29	NUDT1
MAPK10	3.20E-32	0.328892958	0.268	0.108	6.66E-28	MAPK10
PSMD10	4.85E-32	0.50177368	0.413	0.231	1.01E-27	PSMD10
VDAC3	2.53E-31	0.526403865	0.463	0.266	5.26E-27	VDAC3
LMNA	2.89E-31	0.612804436	0.669	0.502	6.02E-27	LMNA
PPIF	3.46E-31	-0.79896851	0.201	0.393	7.20E-27	PPIF
SDHD	3.74E-31	0.328419445	0.53	0.322	7.77E-27	SDHD
MRPL15	1.63E-30	0.428905978	0.327	0.16	3.38E-26	MRPL15
MRPL47	2.29E-30	0.292424322	0.358	0.183	4.76E-26	MRPL47
DECR1	5.97E-30	0.418522333	0.431	0.25	1.24E-25	DECR1
APEX1	1.15E-29	0.576047758	0.508	0.33	2.38E-25	APEX1
MRPL4	3.49E-29	0.255742509	0.349	0.182	7.25E-25	MRPL4
KLC1	9.36E-29	0.523440332	0.475	0.3	1.95E-24	KLC1
DDX1	1.36E-28	0.379005518	0.453	0.277	2.83E-24	DDX1
MRPL16	1.58E-28	0.449242607	0.325	0.167	3.29E-24	MRPL16
MRPL28	1.90E-28	0.392402215	0.4	0.227	3.95E-24	MRPL28
HAX1	4.83E-28	0.44591445	0.437	0.257	1.01E-23	HAX1
RAB11B	5.60E-28	0.250619461	0.577	0.418	1.17E-23	RAB11B
ABCB8	2.18E-27	0.343515909	0.257	0.117	4.54E-23	ABCB8
FAM82A2	1.73E-26	0.354373524	0.32	0.166	3.59E-22	FAM82A2
ATG12	2.73E-26	0.314257146	0.425	0.252	5.69E-22	ATG12
DDX21	3.23E-26	-0.442967693	0.292	0.47	6.72E-22	DDX21
LRPPRC	5.94E-26	0.293566247	0.383	0.219	1.24E-21	LRPPRC
KEAP1	1.32E-25	0.363743133	0.358	0.201	2.75E-21	KEAP1
ATF2	3.47E-25	0.304536918	0.345	0.187	7.22E-21	ATF2
NDUFS2	9.73E-25	0.442580052	0.502	0.335	2.02E-20	NDUFS2
HSPA5	1.03E-24	0.9275565	0.694	0.598	2.14E-20	HSPA5
DEGS1	5.05E-24	0.428899556	0.548	0.381	1.05E-19	DEGS1
GLS	3.68E-23	-0.472617326	0.218	0.38	7.66E-19	GLS
GRSF1	3.72E-23	0.433281274	0.424	0.264	7.74E-19	GRSF1
PNPT1	4.46E-23	0.304852295	0.275	0.139	9.28E-19	PNPT1
MRPL17	9.96E-23	0.289778749	0.269	0.135	2.07E-18	MRPL17
JTB	1.42E-22	0.393630968	0.66	0.483	2.95E-18	JTB
ADPRHL2	1.08E-21	0.37057578	0.254	0.126	2.24E-17	ADPRHL2
TIMM50	4.15E-21	0.297317823	0.335	0.195	8.63E-17	TIMM50
MRPL40	8.60E-21	0.260759645	0.319	0.178	1.79E-16	MRPL40
CLCC1	1.24E-20	0.296251074	0.31	0.172	2.57E-16	CLCC1
YWHAZ	1.75E-20	0.462996062	0.883	0.87	3.65E-16	YWHAZ
UQCR10	2.64E-20	0.314689427	0.769	0.613	5.50E-16	UQCR10
FKBP4	3.80E-20	0.270088736	0.318	0.181	7.90E-16	FKBP4
SDHB	1.40E-19	0.338130831	0.536	0.376	2.92E-15	SDHB
SHMT2	4.78E-19	0.513970502	0.287	0.168	9.95E-15	SHMT2
SLC25A25	5.52E-19	0.313195418	0.32	0.19	1.15E-14	SLC25A25
CST3	9.27E-19	1.04416452	0.926	0.932	1.93E-14	CST3
SNN	1.02E-18	0.309521348	0.361	0.225	2.12E-14	SNN
GOT2	1.86E-18	0.457661674	0.348	0.213	3.87E-14	GOT2
HSPA9	2.36E-18	0.484471471	0.676	0.574	4.91E-14	HSPA9
PHB2	6.28E-18	0.444894188	0.506	0.371	1.31E-13	PHB2
YME1L1	8.07E-18	-0.387098398	0.576	0.666	1.68E-13	YME1L1
TRAK1	4.74E-17	-0.441164926	0.169	0.302	9.85E-13	TRAK1
CAP1	8.54E-17	-0.574339375	0.561	0.678	1.78E-12	CAP1
VAT1	1.72E-16	0.290658209	0.431	0.302	3.58E-12	VAT1
METTL17	6.83E-16	0.250953507	0.351	0.223	1.42E-11	METTL17
MRPL38	4.20E-15	0.276091825	0.318	0.205	8.74E-11	MRPL38
ITPR2	8.12E-15	-0.460187905	0.41	0.548	1.69E-10	ITPR2
ETFB	1.79E-14	0.26952986	0.428	0.308	3.73E-10	ETFB
SLC11A2	1.83E-14	-0.469246622	0.247	0.383	3.80E-10	SLC11A2
PRPF6	3.72E-14	0.252277636	0.376	0.257	7.73E-10	PRPF6
MRPL43	2.75E-13	0.311008869	0.332	0.22	5.73E-09	MRPL43
SOD2	1.43E-12	1.088527787	0.595	0.53	2.98E-08	SOD2
RPS3A	3.40E-12	-0.334449874	0.86	0.876	7.08E-08	RPS3A
HADH	4.98E-12	0.27066712	0.266	0.168	1.04E-07	HADH
SLC25A3	7.08E-12	0.454089389	0.741	0.688	1.47E-07	SLC25A3
RAB7A	3.37E-11	0.288661042	0.735	0.675	7.02E-07	RAB7A
HADHB	2.11E-10	0.268542296	0.547	0.456	4.39E-06	HADHB
DFNA5	2.15E-10	0.325902398	0.326	0.232	4.48E-06	DFNA5
CANX	4.99E-10	0.312483402	0.741	0.691	1.04E-05	CANX
SFXN3	1.45E-09	-0.313744671	0.169	0.262	3.02E-05	SFXN3
VDAC1	1.50E-09	0.312582024	0.577	0.5	3.11E-05	VDAC1
HK1	2.16E-09	-0.3111152	0.252	0.355	4.49E-05	HK1
HK2	4.01E-09	-0.582129909	0.173	0.256	8.33E-05	HK2
BID	8.67E-08	-0.320565121	0.218	0.303	0.001802846	BID
SLC25A37	1.11E-07	-0.485764633	0.373	0.435	0.002301012	SLC25A37
